# Supplementary material
Source: PubMed Central journal article supplement (PMC9669941)
Supplement: sj-pdf-1-jrn-10.1177_17449871221113740.pdf [file sj-pdf-1-jrn-10.1177_17449871221113740.pdf]

**Supplemental Table S1.** Studies included in the review by content theme

| <b>Perspectives on EBN Strategies (n=31, 43%):</b>                                                                                                                                                                                                                                                   |
|------------------------------------------------------------------------------------------------------------------------------------------------------------------------------------------------------------------------------------------------------------------------------------------------------|
| Allen J, Annells M, Clark E, et al. (2012) Mixed methods evaluation research for a renal health screening and referral clinical pathway. <i>Worldviews on Evidence-Based Nursing</i> 9(3): 172-185.                                                                                                  |
| Al Zaabi O, Heffernan M, Holroyd E, et al. (2019) Islamic parents' attitudes and beliefs towards school-based sexual and reproductive health education programmes in Oman. <i>Sex Education</i> 19(5): 534-550.                                                                                      |
| Blackstone S, Iwelunmor J, Plange- Rhule J, et al. (2017) Sustaining nurse-led task-shifting strategies for hypertension control: A concept mapping study to inform evidence-based practice. <i>Worldviews on Evidence-Based Nursing</i> 14(5): 350-357.                                             |
| Cheng H, Eames-Brown R, Tutt A, et al. (2020) Promoting healthy weight for all young children: A mixed methods study of child and family health nurses' perceptions of barriers and how to overcome them. <i>BMC Nursing</i> 19(1): 19-84.                                                           |
| Connolly M, Thomas JM, Orford JA, et al. (2014) The impact of the SAGE and THYME foundation level workshop on factors influencing communication skills in health care professionals. <i>Journal of Continuing Education in the Health Professions</i> 34(1): 37-46.                                  |
| Dale S, Levi C, Ward J, et al. (2015) Barriers and enablers to implementing clinical treatment protocols for fever, hyperglycaemia, and swallowing dysfunction in the Quality in Acute Stroke Care (QASC) Project- A mixed methods study. <i>Worldviews on Evidence- Based Nursing</i> 12(1): 41-50. |
| Eaton LH, Meins AR, Mitchell PH, et al. (2015) Evidence-based practice beliefs and behaviors of nurses providing cancer pain management: A mixed-methods approach. <i>Oncology Nursing Forum</i> . 42(2): 165-73.                                                                                    |
| Felicilda-Reynaldo RFD and Utley R. (2015) Reflections of evidence-based practice in nurse educators' teaching philosophy statements. <i>Nurse Education Perspectives</i> 36(2): 89-95.                                                                                                              |
| Francis-Coad J, Etherton-Ber C, Bulsara C, et al. (2017) Can a web-based community of practice be established and operated to lead falls prevention activity in residential care? <i>Geriatric Nursing</i> 38(2): 133-140.                                                                           |
| Franks H (2014) The contribution of nurse consultants in England to the public health leadership agenda. <i>Journal of Clinical Nursing</i> 23(23-24): 3434-3448                                                                                                                                     |
| Hilton S, Sheppard JJ and Hemsley B. (2016) Feasibility of implementing oral health guidelines in residential care settings: Views of nursing staff and residential care workers. <i>Applied Nursing Research</i> 30(May): 194-203.                                                                  |
| Krein SL , Kowalski CP , Damschroder L, et al. (2008) Preventing ventilator- associated pneumonia in the United States: A multicenter mixed- methods study. <i>Infection Control and Hospital Epidemiology</i> 29(10): 933-940.                                                                      |
| Lam CK and Schubert C (2019) Evidence- Based Practice Competence in Nursing Students: An Exploratory Study With Important Implications for Educators. <i>Worldviews on Evidence- Based Nursing</i> 16(2): 161-168.                                                                                   |
| Loke JCF, Laurenson MC and Lee KW. (2014) Embracing a culture in conducting research requires more than nurses' enthusiasm. <i>Nurse Education Today</i> 34(1): 132-137.                                                                                                                             |
| Munroe B, Curtis K, Buckley T, Lewis M, and Atkins L (2018). Optimising implementation                                                                                                                                                                                                               |

|                                                                                                                                                                                                                                                                   |
|-------------------------------------------------------------------------------------------------------------------------------------------------------------------------------------------------------------------------------------------------------------------|
| of a patient- assessment framework for emergency nurses: A mixed- method study. <i>Journal of Clinical Nursing</i> 27(1-2), e269-e286.                                                                                                                            |
| O'Brien R, Moritz P, Luckey D, et al. (2012) Mixed methods analysis of participant attrition in the nurse-family partnership. <i>Prevention Science</i> 13(3): 219-228.                                                                                           |
| O'Leary DF and Mhaolrúnaigh SN (2012) Information- seeking behaviour of nurses: Where is information sought and what processes are followed? <i>Journal of Advanced Nursing</i> 68(2): 379-390.                                                                   |
| Ploeg J, Skelly J, Rowan M, et al. (2010) The role of nursing best practice champions in diffusing practice guidelines: A mixed methods study. <i>Worldviews on Evidence- Based Nursing</i> 7(4): 238-251.                                                        |
| Repique RJR, Vernig PM, Lowe J, et al. (2016) Implementation of a recovery-oriented training program for psychiatric nurses in the inpatient setting: A mixed-methods hospital quality improvement study. <i>Archives of Psychiatric Nursing</i> 30(6): 722-728.  |
| Rickard CM, Williams G, Ray-Barruel G, et al. (2011) Towards improved organisational support for nurses working in research roles in the clinical setting: A mixed method investigation. <i>Collegian</i> 18(4): 165-176.                                         |
| Russell G, Lane R, Parker S, et al. (2019) Preventive evidence into practice: What factors matter in a facilitation intervention to prevent vascular disease in family practice? <i>BMC Family Practice</i> 20(1): 113.                                           |
| Sibbald SL, Wathen CN, Kothari A, et al. (2013) Knowledge flow and exchange in interdisciplinary primary health care teams (PHCTs): An exploratory study). <i>Journal of the Medical Library Association</i> 101(2): 128-137.                                     |
| Storm- Versloot MN, Knops AM, Ubbink DT, et al. (2012) Long- term adherence to a local guideline on postoperative body temperature measurement: Mixed methods analysis. <i>Journal of Evaluation in Clinical Practice</i> 18(4): 841-847.                         |
| Strandberg EL, Brorsson A, André M, et al. (2016) Interacting factors associated with low antibiotic prescribing for respiratory tract infections in primary health care - A mixed methods study in Sweden. <i>BMC Family Practice</i> 17(1): 78-78.              |
| Sugg HVR, Russell A-M, Morgan LM, et al. (2021) Fundamental nursing care in patients with the SARS-CoV-2 virus: Results from the 'COVID-NURSE' mixed methods survey into nurses' experiences of missed care and barriers to care. <i>BMC Nursing</i> 20(1): 1-17. |
| Thompson C, McCaughan D, Cullum N, et al. (2005) Barriers to evidence- based practice in primary care nursing – Why viewing decision- making as context is helpful. <i>Journal of Advanced Nursing</i> 52(4): 432-444.                                            |
| Van Sluisveld N, Oerlemans A, Westert G., et al. (2017) Barriers and facilitators to improve safety and efficiency of the ICU discharge process: a mixed methods study. <i>BMC Health Services Research</i> 17(1): 1-12.                                          |
| Van Soeren M, Hurlock-Chorostecki C and Reeves S. (2011) The role of nurse practitioners in hospital settings: implications for interprofessional practice. <i>Journal of Interprofessional Care</i> , 25(4): 245-251.                                            |
| Verkaik R, Francke AL, van Meijel B, et al. (2011) Introducing a nursing guideline on depression in dementia: A multiple case study on influencing factors. <i>International Journal of Nursing Studies</i> 48(9): 1129-1139.                                     |

| <b>Development and Assessment of EBN Strategies (n=11, 15%):</b>                                                                                                                                                                                                                             |
|----------------------------------------------------------------------------------------------------------------------------------------------------------------------------------------------------------------------------------------------------------------------------------------------|
| Black TA, Balneaves GL, Garossino HC, et al. (2015) Promoting evidence-based practice through a research training program for point-of-care clinicians. <i>Journal of Nursing Administration</i> 45(1): 14-20.                                                                               |
| Campbell TD and Profetto-Mcgrath DJ. (2013) Skills and attributes required by clinical nurse specialists to promote evidence-based practice. <i>Clinical Nurse Specialist</i> 27(5): 245-254.                                                                                                |
| Conway A, Rolley J, Page K, et al. (2014) Clinical practice guidelines for nurse-administered procedural sedation and analgesia in the cardiac catheterization laboratory: A modified Delphi study. <i>Journal of Advanced Nursing</i> 70(5): 1040-1053.                                     |
| Gifford WA, Davies BL, Graham ID, et al. (2013) Developing leadership capacity for guideline use: A pilot cluster randomized control trial. <i>Worldviews on Evidence-Based Nursing</i> 10(1): 51-65.                                                                                        |
| Griffiths J, Wilson C, Ewing G, et al. (2015) Improving communication with palliative care cancer patients at home - A pilot study of SAGE and THYME communication skills model. <i>European Journal of Oncology Nursing</i> 19(5): 465-472.                                                 |
| Kerr S, Whyte R, Watson H, et al. (2011) A mixed-methods evaluation of the effectiveness of tailored smoking cessation training for healthcare practitioners who work with older people. <i>Worldviews on Evidence-Based Nursing</i> 8(3): 177-186.                                          |
| Laibhen- Parkes N, Kimble LP, Melnyk BM, et al. (2018) An adaptation of the original Fresno test to measure evidence-based practice competence in pediatric bedside nurses. <i>Worldviews on Evidence-Based Nursing</i> 15(3): 230-240.                                                      |
| LaMar RA. (2017) Using a virtual journal club for sharing evidence-based practice recommendations in critical care registered nurses. <i>Teaching and Learning in Nursing</i> 12(1): 53-58.                                                                                                  |
| Parsons V, Juszczak D, Gilworth G, et al. (2021) A case management occupational health model to facilitate earlier return to work of NHS staff with common mental health disorders: a feasibility study. <i>Health Technology Assessment</i> 25(12): 1-94.                                   |
| Robert G, Morrow E, Maben J, et al. (2011) The adoption, local implementation and assimilation into routine nursing practice of a national quality improvement programme: The Productive Ward in England. <i>Journal of Clinical Nursing</i> 20(7-8): 1196-1207.                             |
| Schalkwijk AAH, Nijpels G, Bot SDM, et al. (2016) Health care providers' perceived barriers to and need for the implementation of a national integrated health care standard on childhood obesity in the Netherlands - a mixed methods approach. <i>BMC Health Services Research</i> 16: 83. |
| Stacey D, Carley M, Ballantyne B, et al. (2015) Perceived factors influencing nurses' use of evidence-informed protocols for remote cancer treatment-related symptom management: A mixed methods study. <i>European Journal of Oncology Nursing</i> 19(3): 268-277.                          |
| Stoddart K, Bugge C, Shepherd A, et al. (2014) The new clinical leadership role of senior charge nurses: A mixed methods study of their views and experience. <i>Journal of Nursing Management</i> 22(1): 49-59.                                                                             |
| Strandberg E, Catrine Eldh A, Forsman H, et al. (2014) The concept of research utilization as understood by Swedish nurses: Demarcations of instrumental, conceptual, and persuasive research utilization. <i>Worldviews on Evidence-Based Nursing</i> 11(1): 55-64.                         |
| Titzer LJ, Shirey RM and Hauck RS. (2014) A nurse manager succession planning model with                                                                                                                                                                                                     |

|                                                                                                                                                                                                                                                                                                                                         |
|-----------------------------------------------------------------------------------------------------------------------------------------------------------------------------------------------------------------------------------------------------------------------------------------------------------------------------------------|
| associated empirical outcomes. <i>Journal of Nursing Administration</i> 44(1): 37-46.                                                                                                                                                                                                                                                   |
| <b>Implementation/Evaluation of EBN Strategies (n=30, 42%):</b>                                                                                                                                                                                                                                                                         |
| Amacher AE, Nast I, Zindel B, et al. (2016) Experiences of general practitioners, home care nurses, physiotherapists and seniors involved in a multidisciplinary home-based fall prevention programme: A mixed method study. <i>BMC Health Services Research</i> 16.                                                                    |
| Aventin Á, Gough A, McShane T, et al. (2020) Engaging parents in digital sexual and reproductive health education: Evidence from the JACK trial. <i>Reproductive Health</i> 17(1): 132.                                                                                                                                                 |
| Breimaier HE, Halfens RJG and Lohrmann C. (2015) Effectiveness of multifaceted and tailored strategies to implement a fall-prevention guideline into acute care nursing practice: A before-and-after, mixed-method study using a participatory action research approach. <i>BMC Nursing</i> 14(1).                                      |
| Bleijenberg N, Ten Dam VH, Drubbel I, et al. (2016) Treatment fidelity of an evidence- based nurse- led intervention in a proactive primary care program for older people. <i>Worldviews on Evidence- Based Nursing</i> 13(1): 75-84.                                                                                                   |
| Carvalho Teixeira AI, Lopes Sousa Morais Teixeira LO, Gomes Pereira RP, et al. (2021) Development of nurses' evidence-based practice skills: Contributions of clinical supervision. <i>Rev Rene</i> 22(1): 1-9.                                                                                                                         |
| Coorey G, Peiris D, Scaria A, et al. (2021) An Internet-Based Intervention for Cardiovascular Disease Management Integrated With Primary Care Electronic Health Records: Mixed Methods Evaluation of Implementation Fidelity and User Engagement. <i>Journal of Medical Internet Research</i> 23(4): e25333.                            |
| De La Rue-Evans L, Nesbitt K and Oka RK. (2013) Sleep hygiene program implementation in patients with traumatic brain injury. <i>Rehabilitation Nursing</i> 38(1): 2-10.                                                                                                                                                                |
| Dogherty EJ, Harrison MB, Baker C, et al. (2012) Following a natural experiment of guideline adaptation and early implementation: A mixed-methods study of facilitation. <i>Implementation Science</i> 7: 9.                                                                                                                            |
| Ersek M and Jablonski A. (2014) A mixed-methods approach to investigating the adoption of evidence-based pain practices in nursing homes. <i>Journal of Gerontological Nursing</i> 40(7): 52-60.                                                                                                                                        |
| Evans CJ, Bone AE, Yi D, et al. (2021) Community-based short-term integrated palliative and supportive care reduces symptom distress for older people with chronic noncancer conditions compared with usual care: A randomised controlled single-blind mixed method trial. <i>International Journal of Nursing Studies</i> 120: 103978. |
| Gire N, Caton N, McKeown M, et al. (2021) 'Care co-ordinator in my pocket': a feasibility study of mobile assessment and therapy for psychosis (TechCare). <i>BMJ Open</i> 11(11): e046755.                                                                                                                                             |
| Hagen S, Bugge C, Dean SG, et al. (2020) Basic versus biofeedback-mediated intensive pelvic floor muscle training for women with urinary incontinence: the OPAL RCT. <i>Health Technology Assessment</i> 24(70): 1-144.                                                                                                                 |
| Hernández D, Topping A, Hutchinson CL, et al. (2019) Client attrition in the Nurse- Family Partnership: Revisiting metrics of impact in a home visitation program in the United States. <i>Health &amp; Social Care in the Community</i> 27(4): e483-e493.                                                                              |
| Horwood J, Brangan E, Manley P, et al. (2020) Management of chlamydia and gonorrhoea infections diagnosed in primary care using a centralised nurse-led telephone-based                                                                                                                                                                 |

|                                                                                                                                                                                                                                                                                               |
|-----------------------------------------------------------------------------------------------------------------------------------------------------------------------------------------------------------------------------------------------------------------------------------------------|
| service: mixed methods evaluation. <i>BMC Family Practice</i> 21(1): 265.                                                                                                                                                                                                                     |
| Kienlin S, Nytrøen K, Stacey D, et al. (2020) Ready for shared decision making: Pretesting a training module for health professionals on sharing decisions with their patients. <i>Journal of Evaluation in Clinical Practice</i> 26(2): 610-621.                                             |
| Lawani MA, Turgeon Y, Côté L, et al. (2021) User-centered and theory-based design of a professional training program on shared decision-making with older adults living with neurocognitive disorders: A mixed-methods study. <i>BMC Medical Informatics and Decision Making</i> 21(1): 1-25. |
| Lin F, Marshall AP, Gillespie B, et al. (2020) Evaluating the implementation of a multi-component intervention to prevent surgical site infection and promote evidence-based practice. <i>Worldviews on Evidence-Based Nursing</i> 17(3): 193-201.                                            |
| Mhyre J, Ward N, Whited TM, et al. (2020) Randomized controlled simulation rrial to compare rransfer procedures for emergency cesarean. <i>Journal of Obstetric Gynecologic and Neonatal Nursing</i> 49(3): 272-282.                                                                          |
| Miller LB, Brennan-Cook J, Turner B, et al. (2018) Utilizing an evidence-based alcohol screening tool for identification of alcohol misuse. <i>Journal of Addictions Nursing</i> 29(2): 90-95.                                                                                                |
| Morris LT and Hancock RD. (2013) Institute of Medicine core competencies as a foundation for nursing program evaluation. <i>Nursing Education Perspective</i> 34(1): 29-33.                                                                                                                   |
| Nordsteien A, Horntvedt M-ET and Syse J. (2017) Use of research in undergraduate nursing students' theses: A mixed methods study. <i>Nurse Education Today</i> 56: 23-28.                                                                                                                     |
| Øye, C., Mekki, T.E., Skaar, R. et al. (2015) Evidence molded by contact with staff culture and patient milieu: An analysis of the social process of knowledge utilization in nursing homes. <i>Vocations and Learning</i> 8(3): 319-334.                                                     |
| Pagan M and Harvey P (2019) Implementing a pilot skin and wound care programme in two residential aged care facilities. <i>Wound Practice &amp; Research</i> 27(4): 184-192.                                                                                                                  |
| Sánchez A, Rogers HL, Pablo S, et al. (2021) Fidelity evaluation of the compared procedures for conducting the PVS-PREDIAPS implementation strategy to optimize diabetes prevention in primary care. <i>BMC Family Practice</i> 22(1): 1-16.                                                  |
| Sawan M, O'Donnell LK, Reeve E, et al. (2021) The utility of a computerised clinical decision support system intervention in home medicines review: A mixed-methods process evaluation. <i>Res Social Adm Pharm</i> 17(4): 715-722.                                                           |
| Sidani S, Manojlovich M, Doran D, et al. (2016) Nurses' perceptions of interventions or the management of patient- oriented outcomes: A key factor for evidence- based practice. <i>Worldviews on Evidence- Based Nursing</i> 13(1): 66-74.                                                   |
| Smeulers M, Dolman CD, Atema D, et al. (2016) Safe and effective nursing shift handover with NURSEPASS: An interrupted time series. <i>Applied Nursing Research</i> 32: 199-205.                                                                                                              |
| White K, Potter R, Patel S, et al. (2019) Chronic headache education and self-management study (CHESS) - a mixed method feasibility study to inform the design of a randomised controlled trial. <i>BMC Medical Research Methodology</i> 19(1): 30.                                           |
